# Supplementary material for: Stochastic changes affect Solanum wild species following autopolyploidization
Source: PubMed Central journal article supplement — J Exp Bot. 2013 Jan 31;64(2):625–35. doi: 10.1093/jxb/ers357 (PMC3542052; doi:10.1093/jxb/ers357), 2013-01-31
Supplement: supp_ers357_jexbot086579_file001.pdf [file supp_ers357_jexbot086579_file001.pdf]

**Supplementary material to:**

**Stochastic changes affect *Solanum* wild species following autopolyploidization**

Riccardo Aversano, Immacolata Caruso, Giovanna Aronne, Veronica De Micco, Nunzia Scognamiglio, Domenico Carputo

| Case                    | 5' C C G G 3' |   |   |   | Banding pattern |             |
|-------------------------|---------------|---|---|---|-----------------|-------------|
|                         | 3' G G C C 5' |   |   |   | <i>HpaII</i>    | <i>MspI</i> |
| 1. Null methylation     | ○             | ○ | □ | □ | +               | +           |
| 2. Full methylation     | ●             | ● | □ | □ | -               | -           |
| 3. Full CHG methylation | ●             | ○ | □ | □ | -               | -           |
| 4. Hemi CHG methylation | ●             | ○ | □ | □ | +               | -           |
| 5. Hemi CG methylation  | ○             | ● | □ | □ | -               | +           |
| 6. Full CG methylation  | ○             | ● | □ | □ | -               | +           |

○ = unmethylated Cytosine    ● = methylated Cytosine    □ = Guanine  
+ = presence of the band    - = absence of the band

**Supplementary Fig 1. Possible methylation states at 5'CCGG sites, and the corresponding banding patterns produced by the isoschizomers *HpaII* and *MspI*.** Plus and minus signs denote the presence and absence of the bands at a given locus. *HpaII* and *MspI* are isoschizomers that recognize the same tetranucleotide sequence 5'-CCGG, but have differential sensitivity to certain methylation states of the two cytosines: *HpaII* does not cut if either cytosine is fully (both strands) methylated. Whereas *MspI* does not cut if the external cytosine is fully- or hemi- (only one strand) methylated. Thus, for a given DNA sample, unmethylation of cytosines at the 5'-CCGG site result in concomitant presence (+) of the bands for both *HpaII* and *MspI* (case 1). On the other hand, simultaneous full methylation of either all cytosines (case 2) or the external cytosines (marked as CHG, case 3) will be revealed as concomitant absence (-) of a band with both enzymes. Hemimethylation of the external or internal (marked as CG) cytosine (case 4 and 5), as well as full methylation of the internal cytosine (cases 6), is revealed by the presence of a band in only one of the enzyme digests.

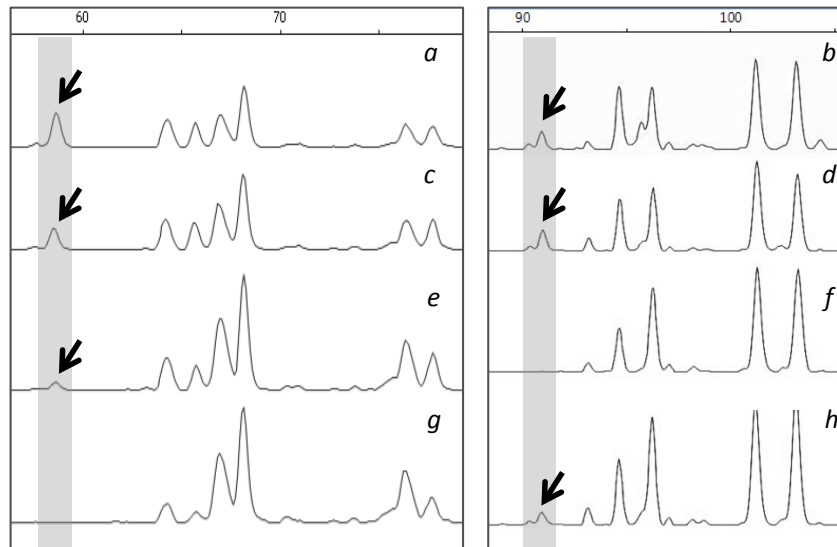

**Supplementary Fig 2. Examples of MSAP electropherograms on 2x and 4x genotypes of *S. commersonii* generated using *HpaII* and *MspI* isoschizomers, and primers E-TCAA/HM-AGC (*left panel*) and E-TCAA/HM-ACC (*right panel*). *a* and *b*) MSAP traces from *cmm1t* (2x) diploid parent generated using *HpaII*; *c* and *d*) traces of *cmm1t* using *MspI*; *e* and *f*) traces of the synthetic tetraploid *cmm23* generated using *HpaII*; *g* and *h*) traces of *cmm23* using *MspI*. Polymorphic peaks (arrowed in the grey area) show CHG hypermethylation (left panel) and CG hypermethylation (right panel) in *cmm23* respect to its diploid progenitor *cmm1t*.**
